1 **Identification of a new Infectious Pancreatic Necrosis Virus (IPNV) isolate in Atlantic**  
2 **salmon (*Salmo salar* L.) that causes mortality in resistant fish**

3

4

5 Borghild Hillestad<sup>1</sup>, Stein Johannessen<sup>1</sup>, Geir Olav Melingen<sup>2</sup> and Hooman K. Moghadam<sup>1\*</sup>

6 <sup>1</sup>*Benchmark Genetics Norway AS, Sandviksboder 3A, N-5035 Bergen, Norway;*

7 <sup>2</sup>*Benchmark Genetics, Sandviksboder 3A, N-5035 Bergen, Norway;*

8

9

10

11 **Article type:**

12 Original Research

13

14

15

16 **Running title:**

17 Identification of a new pathogenic IPNV isolate

18

19

20

21 **\*Corresponding author:**

22 Hooman K. Moghadam, hooman.moghadam@bmkgenetics.com

23 **Abstract**

24 Infectious pancreatic necrosis (IPN) is an important viral disease of salmonids that can affect fish  
25 during various life cycles. In Atlantic salmon, selecting for genetically resistant animals against  
26 IPN has been one of the most highly praised success stories in the history of fish breeding. The  
27 findings that resistance against this disease has a significant genetic component, which is mainly  
28 controlled by variations in a single gene, has helped to reduce the IPN outbreaks over the past  
29 decade to a great extent. In this paper, we present the identification of a new isolate of the IPN  
30 virus, from a field outbreak, that had caused mortality, even in the genetically resistant animals.  
31 We recovered and assembled the full-length genome of this virus, following deep-sequencing of  
32 an infected tissue. The comparative sequence analysis revealed that for the critical amino acid  
33 motifs, previously found to be associated with the degree of virulence, the newly identified isolate  
34 is similar to the virus's avirulent form. However, we detected a set of deduced amino acid residues,  
35 particularly in the hypervariable region of the polyprotein, that collectively are unique to this strain  
36 compared to all other reference sequences assessed in this study. We suggest that these mutations  
37 have likely equipped the virus with the capacity to escape the host defence mechanism more  
38 efficiently, even in the genetically deemed IPN resistant animals.

39

40

41 **Keywords:**

42 Infectious pancreatic necrosis (IPN); RNA sequencing; Genome assembly; Quantitative Trait  
43 Locus (QTL); Atlantic salmon;

## 44 **Introduction**

45 Infectious pancreatic necrosis (IPN) is one of the leading viral diseases of the Norwegian farmed  
46 Atlantic salmon (*Salmo salar* L.). The disease was first reported in 1941, following an outbreak in  
47 brook trout (*Salvelinus fontinalis* L.) in Canada (M'Gonigle, 1941). Further, the characterisation  
48 of the causative agent, the IPN virus (IPNV), was performed in 1960 (Wolf et al., 1960). In  
49 Norway, the virus was first isolated in 1975 from freshwater rainbow trout (*Oncorhynchus mykiss*  
50 L.) (Hastein and Krogsrud, 1976) and was designated as a notifiable disease from 1991 till 2008  
51 (Sommerset et al., 2020). The virus can infect Atlantic salmon during all of its developmental  
52 stages, but the fish are especially susceptible as fry, during start-feeding, and post-smolts, soon  
53 after transfer to seawater (Roberts and Pearson, 2005; Sommerset et al., 2020). As suggested by  
54 the name, the pancreas is the primary target tissue of IPNV. However, the liver has also been  
55 shown to be one of the key organs affected by this virus (Ellis et al., 2010; Munang'Andu et al.,  
56 2013). In addition to significant economic losses, this disease is a concern for animal welfare, as  
57 survivors following infection can continue to infect naïve fish (Roberts and Pearson, 2005).

58 IPNV is a double-stranded RNA virus that belongs to the *Birnaviridae* family. A characteristic  
59 feature of the birnaviruses is their possession of a bi-segmented genome (i.e., A and B segments),  
60 contained within a non-enveloped, icosahedral capsid (Dobos and Roberts, 1983; Duncan et al.,  
61 1987; Duncan and Dobos, 1986). The smaller genomic segment, the B segment, is about 2.5 kb in  
62 size and consists of a single open reading frame (ORF), encoding an RNA-dependent, RNA  
63 polymerase VP1 (approximately 90 kDa) (Duncan et al., 1987; Duncan and Dobos, 1986). The A-  
64 segment is approximately 3 kb, and it contains two, partially overlapping ORFs (Duncan and  
65 Dobos, 1986). The first ORF, encodes VP5, a small, cysteine-rich, non-structural protein of about  
66 17 kDa. A precursor polyprotein (NH<sub>2</sub>-preVP2-NS VP4 protease-VP3-COOH) of approximately

67 106 kDa constitutes the second and the larger ORF. The encoded VP4 protease cleavages the  
68 polyprotein into its two main components, the preVP2 and VP3. The preVP2 further matures to  
69 become VP2 and forms the outer capsid protein, containing the neutralizing epitopes and sites that  
70 facilitate cell attachment (Dopazo, 2020; Heppell et al., 1995b). The VP3 is the inner capsid protein  
71 (Duncan et al., 1987; Duncan and Dobos, 1986) but also in association with the VP1 it seems to  
72 be involved in viral packaging and replication (Tacken et al., 2002).

73 Based on cross-neutralizing tests, the aquatic birnaviruses are broadly divided into two main  
74 serogroups, A and B (Hill and Way, 1995). The serogroup A comprises of nine different serotypes,  
75 A<sub>1</sub>-A<sub>9</sub>. Most of the isolates from the USA fall within the A<sub>1</sub> serotype (West Buxton; WB), the A<sub>2</sub>-  
76 A<sub>5</sub> include mainly the European isolates (A<sub>2</sub> (Spjarup; Sp), A<sub>3</sub> (Abild; Ab), A<sub>4</sub> (Hecht, He) and A<sub>5</sub>  
77 (Te)), and A<sub>6</sub>-A<sub>9</sub> are predominantly variants from Canada (A<sub>6</sub> (Canada 1; C1), A<sub>7</sub> (Canada 2; C2),  
78 A<sub>8</sub> (Canada 3; C3) and A<sub>9</sub> (Jasper)) (Blake et al., 2001; Hill and Way, 1995). The serogroup B  
79 consists of only one serotype (B<sub>1</sub> (Tellinavirus; TV1)) that is non-pathogenic in fish. Based on the  
80 analysis of variations in the nucleotide and the deduced amino acids of the VP2, Blake et al. (2001)  
81 later proposed that aquatic birnaviruses constitute six major genogroups. These groups correspond  
82 relatively well with the geographical origins and serological classifications previously suggested.  
83 According to this classification, WB and the Jasper strains constitute genogroup 1, the A<sub>3</sub> serotype  
84 forms genogroup 2, C1 and Te make genogroup 3, the two Canadian strains, C2 and C3 form  
85 genogroup 4, all European isolates of serotype A<sub>2</sub> cluster into genogroup 5 and the He strain  
86 constitutes genogroup 6 (Blake et al., 2001). A seventh genogroup was also suggested based on  
87 isolates recovered from Japanese aquatic sources (Nishizawa et al., 2005).

88 Despite extensive vaccination efforts, disinfection and targeted breeding programs, IPN outbreaks  
89 remains a concern in farmed Atlantic salmon. Related mortalities can be substantial and in part,

90 can be a function of the genetic makeup of the host (Guy et al., 2006; Houston et al., 2008; Moen  
91 et al., 2009), management and environmental factors (Jarp et al., 1995; Sundh et al., 2009), and  
92 the strain and specific genetic variations carried by the virus (Skjesol et al., 2011; Song et al.,  
93 2005). There are ample examples of isolates, belonging to the same serotype, to cause different  
94 degrees of virulence in the host (e.g., Bruslind and Reno, 2000; Santi et al., 2004; Shivappa et al.,  
95 2004), and indeed, there have been many studies, investigating the molecular basis of IPNV  
96 virulence in Atlantic salmon (e.g., Mutoloki et al., 2016; Santi et al., 2004, 2005; Skjesol et al.,  
97 2011; Song et al., 2005). Although the genetic details of such processes are not yet fully  
98 understood, most studies speculated, and chiefly investigated, the genetic variations in segment A  
99 concerning the degree of virulence in IPNV. In particular, specific amino acid motifs in the VP2  
100 of the polyprotein have been suggested to be most prevalent and in association with the virulent  
101 forms of the pathogen (Bruslind and Reno, 2000; Munang'andu et al., 2016; Mutoloki et al., 2016;  
102 Santi et al., 2004; Shivappa et al., 2004; Song et al., 2005). Variations in the amino acid residues  
103 in positions 217, 221 and 247 of the VP2 have been of particular focus (Dopazo, 2020; Julin et al.,  
104 2013; Munang'andu et al., 2016; Mutoloki et al., 2016; Santi et al., 2004; Song et al., 2005).  
105 Further, assessment of the recombinant viral strains, have indicated that the residue 217 of the VP2  
106 might be the most crucial amino acid that can result in the loss or gain of virulence (e.g., Song et  
107 al., 2005).

108 Despite concerns and economic losses due to infection by IPNV, increased resistance against this  
109 virus through selective breeding is among the most remarkable success stories in the history of  
110 aquaculture and salmon breeding in particular. The initial attempt to estimate the genetic  
111 parameters controlling this trait, which was based on mortality in the field and controlled challenge  
112 testing, had shown that resistance to IPNV has a significant and heritable genetic component ( $h^2$ )

113 of 0.17-0.62) (Kjøglum et al., 2008; Wetten et al., 2007). However, the breakthrough came with  
114 the finding that resistance to IPNV is mainly controlled by variations in a single quantitative trait  
115 locus (QTL) on chromosome 26 (Houston et al., 2008, 2010; Moen et al., 2009). Subsequent work  
116 identified mutations in the epithelial cadherin gene (*cdh1*) as the causative genetic variation for  
117 IPNV resistance in Atlantic salmon (Moen et al., 2015). Following the inclusion of this QTL into  
118 the breeding programs in Norway, the industry witnessed a sharp decline in the number of IPN  
119 outbreaks throughout the country, dropping from 223 to only 19 reported cases from 2009 to 2019  
120 (Sommerset et al., 2020).

121 This paper reports the identification and whole-genome sequence assembly and analysis of a new  
122 IPNV variant. The isolate was recovered from a field outbreak in West of Norway following  
123 reported mortalities, due to an IPN infection, among QTL homozygous or heterozygous IPN  
124 resistant fish. We describe the amino acid motifs that distinguish this isolate from other  
125 phylogenetically related variants and suggest that these mutations are likely to play an essential  
126 role in this isolate's pathogenicity.

## 127 **Materials and Methods**

### 128 **Field outbreak and sample collection**

129 In May of 2019, there was an IPN field outbreak in a Western region of Norway. The affected fish  
130 were Atlantic salmon of the SalmoBreed strain, delivered as IPN QTL, all favourable homozygous  
131 or heterozygous for the QTL locus (Houston et al., 2008; Moen et al., 2009). Fish were at the post-  
132 smolt stage with an approximate average weight of about 700 – 800 gr at the time of the outbreak.  
133 The reported mortality reached about 10%, a high percentage for field outbreak among QTL  
134 carrying fish. The IPNV infection was identified following an inspection by the veterinary  
135 authorities. The diagnosis was later validated by detection of the VP2 segment of the viral genome

136 using polymerase chain reaction (qRT-PCR) of the infected head-kidney and through  
137 histopathological and immunohistochemical examinations of the liver and pancreatic tissues  
138 (Figure 1A and B), all performed at the Fish Vet Group Norway (<http://fishvetgroup.no>)  
139 (Supplementary Table 1). Tissues were fixed in a 4% formalin solution (4% formalin, 0.08M  
140 sodium phosphate, pH 7.0), processed using Thermo Scientific Excelsior® and embedded in  
141 Histowax with the aid of Tissue – Tek®, TEC 5 (Sakura) embedding system. The embedded  
142 tissues were then sectioned at 1.5-2 µm using a Leica RM 2255 Microtome and stained with  
143 Hematoxylin-Eosin (HE). The stained sections were scanned in an Aperio ScanScope AT Turbo  
144 slide scanner and read using Aperio Image Scope (Leica Biosystems). The scans were examined  
145 and scored in a blind fashion, i.e., without information about the animal's history. A clip from the  
146 adipose fin was also sampled and stored in 95% ethanol for DNA extraction and genotyping of ten  
147 fish, five moribund and five dead. We genotyped these fish for the genetic markers used to assign  
148 individuals as QTL carrier (Houston et al., 2008; Moen et al., 2009, 2015), and confirmed all  
149 animals carry IPN QTL.

#### 150 **Transcriptome sequencing and viral genome assembly**

151 The head-kidney was collected from six infected fish (<http://fishvetgroup.no/pcr-2/#1452163253406-d81f6dce-bdf9>), all at a moribund state, and stored in RNALater® (Ambion).  
152 Total RNA extraction was performed using the RNeasy® Plus mini kit (Qiagen). Nanodrop ND-  
153 1000 Spectrophotometer (NanoDrop Technologies) was used to assess the concentration and  
154 purity of the extracted genetic materials. The Norwegian Sequencing Centre performed library  
155 construction and sequencing the total RNA on an Illumina HiSeq 4000 platform as paired-end (PE)  
156 150 bp reads.

158 We first cleaned the sequence data by removing low-quality nucleotides and sequencing adapters  
159 using Trimmomatic (v.0.36) (Bolger et al., 2014). The ribosomal RNA (rRNA) was then identified  
160 through a similarity search against the SILVA rRNA database (Quast et al., 2013) and excluded  
161 from subsequent analysis. The host-specific transcriptome was detected by aligning the remaining  
162 reads against the Atlantic salmon reference genome assembly (ICSASG\_v2) (Lien et al., 2016)  
163 using TopHat (v.2.0.13) (Trapnell et al., 2009, 2012). The un-aligned reads were then blasted  
164 against the IPNV reference assemblies (ASM397166v1, ASM397170v1, ASM397174v1,  
165 ASM397168v1, ASM397172V1 and ViralMultiSegProj15024) by setting “task” as “megablast”,  
166 “word size” to 7 and “expectation value threshold” to  $1.00e^{-07}$ . All the reads that aligned to the  
167 IPNV reference sequences were extracted, pooled into a single sequence datafile per animal, and  
168 then fed into Trinity (v.2.11.0) (Grabherr et al., 2011) with the default parameter settings to  
169 construct assemblies.

#### 170 **Comparative genomics and phylogenetic analysis**

171 We compared the assembled viral genomes to one another (Supplementary Tables 1 and 2), and  
172 against various reference isolates, with different degrees of virulence (Dopazo, 2020; Julin et al.,  
173 2013; Munang'andu et al., 2016; Mutoloki et al., 2016; Santi et al., 2004; Song et al., 2005) (Table  
174 1) or strains representing different genogroups, as previously suggested (Blake et al., 2001) (Table  
175 2). Further, we assessed the deduced amino acids of these isolates to any IPNV sequence in the  
176 NCBI database with a complete polyprotein or VP1 information (Supplementary Files 1 and 2).  
177 The sequences included 90 isolates with the full coding sequence for the polyprotein and 120 for  
178 the VP1. Both, the nucleotide and amino acid alignments were performed using ClustalX (Larkin  
179 et al., 2007) implemented in Unipro UGENE (v36.0) (Okonechnikov et al., 2012) or Muscle  
180 (Edgar, 2004) implemented in Seqotron (v1.0.1) (Fourment and Holmes, 2016). Unipro UGENE



181 and Mega X (v10.1.7) (Kumar et al., 2018) were also used to assess sequence similarity, calculate  
182 pair-wise distances for nucleotide and amino acid data, and to construct phylogenetic associations  
183 using the neighbour-joining (NJ) method. To assess the confidence of node assignments, we  
184 performed 1000 bootstrap replications.

## 185 **Results and Discussion**

### 186 **Transcriptome sequencing and genome assembly**

187 This paper describes the genomic features of IPNV isolates, responsible for a field outbreak in an  
188 Atlantic salmon population. The post-mortem examination identified IPN infection as the chief  
189 cause of mortality among all fish investigated. The histopathological and immunohistochemical  
190 examinations (Figure 1A and B and Supplementary Table 1) and the viral genetic material detected  
191 through qRT-PCR amplification (Supplementary Table 1) further confirmed earlier diagnosis. We  
192 found that the genotypes of all animals examined in this study were consistent with an IPN resistant  
193 animal (Houston et al., 2008; Moen et al., 2009, 2015). Further, assessment of the transcriptome  
194 sequence data confirmed that all fish carried at least one favourable copy of the causal mutation in  
195 the *cdh1* gene, conferring resistance against IPNV (Moen et al., 2015). The causal mutation, which  
196 is in the form of a single nucleotide polymorphic (SNP) variation, is located in the protein-coding  
197 sequence of *cdh1* (ssa26:15192533; C/T) and can change Proline (P) to Serine (S), with the former  
198 amino acid found to be associated with the IPNV resistance (Moen et al., 2015). It is expected that  
199 in a heterozygote fish, the favourable allele exhibit close to complete dominant effect in response  
200 to the virus (Moen et al., 2015). Among the animals investigated in this study, three fish were  
201 homozygous for the favourable allele (C/C), and the other three were heterozygous (C/T). The  
202 extracted RNA was sequenced to high depth, with an average of 60 million PE reads per animal.  
203 Following the rRNA's exclusion, more than 45 million PE reads per fish remained for the

204 assemblage of the host's viral genome and profiling gene expression. Together, the two segments  
205 of the IPNV genome consist of about 5800 nucleotides. On average, we obtained 56-fold coverage  
206 of the viral genome from each of the animals in our sequence data. Here, we refer to the assembled  
207 viral genomes as BG\_x\_y, where x denotes the animal's id (1-6) and y refers to the viral genome's  
208 specific segment (e.g., VP1 or polyprotein).

### 209 **Comparative sequence analysis of the polyprotein**

210 Comparative genomic analysis between the six assembled genomes revealed at least two different,  
211 closely linked variants, caused the field outbreak in the population investigated (Figure 2A and B;  
212 Supplementary Table 2A and B). The nucleotide sequences of the polyprotein are identical in four  
213 of the assemblies (BG\_1\_polyprot to BG\_4\_polyprot) and contain nine polymorphic sites  
214 compared to the other two assembled sequences (i.e., BG\_5\_polyprot and BG\_6\_polyprot). Two  
215 of the polymorphisms are nonsynonymous, changing the amino acid residues in positions 47  
216 (aspartate (D) to glutamate (E)) and 717 (lysine (K) to glutamine (Q)).

217 In a study, aiming to trace the IPNV infection signatures from hatcheries to the sea (Kristoffersen  
218 et al., 2018), the authors have recovered a partial fragment of the polyprotein from an isolate  
219 (accession number: MH562009), with very similar nucleotide sequence to the ones reported here.  
220 Recently, in controlled infection challenge testing, the mortality induced by this isolate among  
221 full-sib families was compared with a standard, virulent form of the virus (AY379740.1). While  
222 the infection with the latter variant resulted in approximately 30% mortality, mainly among the  
223 non-QTL fish, the former isolate caused more than 75% mortality, treating the QTL and non-QTL  
224 fish alike (Ørpetveit et al. in preparation; <https://www.vetinst.no/nyheter/endinger-i-ipn-viruset-gjor-fisken-mer-utsatt-for-sykdom>,  
225 <https://www.fishfarmingexpert.com/article/changes-in-ipn-virus-make-salmon-more-susceptible>,  
226 <https://salmobreed.no/articles/benchmark-genetics->

227 [intensiverer-forskningen-pa-nytt-ipn-virus](#)). Comparison between the nucleotide sequences of this  
228 isolate with our assembled genomes shows divergence ranging from 0.003-0.004 (Supplementary  
229 Figure 1A). However, this isolate has deduced amino acid sequences identical to the translated  
230 sequences from our first four assemblies (Supplementary Figure 1B), indicating that this variant  
231 is likely to be the ancestral form and the other variants (i.e., BG\_5\_VP2 and BG\_6\_VP2) are more  
232 recently derived. One of the main characteristics of RNA viruses is their high mutation rates,  
233 mainly attributed to their lack of an effective proofreading activity. Therefore, finding different  
234 sequence variants from the same outbreak might not be surprising, but it indeed is important, as it  
235 will allow one to follow the trajectory of pathogen evolution through time and space.  
236 Comparative assessment of the polyprotein nucleotide (data not shown) as well as the amino acid  
237 sequence data with multiple reference strains (Figure 2A) shows our assemblies are most closely  
238 related to the Sp serotype (genogroup 5). However, they also constitute a distinct group within this  
239 serotype compared to Sp isolates assessed in this study (Figure 2A; Supplementary Figure 2A).  
240 Several investigations have previously reported variations in some amino acid residues,  
241 particularly in the VP2 of the polyprotein, to be associated with the degree of the IPNV virulence  
242 (Bruslind and Reno, 2000; Munang'andu et al., 2016; Mutoloki et al., 2016; Santi et al., 2004;  
243 Shivappa et al., 2004; Song et al., 2005). Interestingly, the amino acid motifs found in the six  
244 assembled genomes in this study are mainly consistent with the virus's avirulent form (Table 1)  
245 (Santi et al., 2004; Shivappa et al., 2004; Song et al., 2005). For instance, for the most critical  
246 positions associated with the virulence, i.e., 217, 221 and 247 of the VP2, the amino acid residues  
247 of our assembled genomes are proline (P), threonine (T) and alanine (A) (Table 1; Supplementary  
248 File 1), while it is expected that in the virulent form, the corresponding residues to be T, A and T,  
249 respectively (Mutoloki et al., 2016; Santi et al., 2004; Song et al., 2005). On the other hand, we

250 identified ten amino acid residues in the assembled genomes' polyprotein, that either exclusively  
251 or with a disproportionate frequency are found in the reported isolates (Table 2; Supplementary  
252 File 1). Nine of these sites are within the VP2, and one is located in the VP4. In the VP2, these  
253 residues are all in proximity to one another, encompassing the hypervariable region (Blake et al.,  
254 2001; Heppell et al., 1995b). Specifically, these residues are located in positions 245, 248, 252,  
255 255, 257, 278, 282, 285, 321 (Table 2; Supplementary File 1). This data provides additional  
256 support for the previously suggested notion that the amino acid motifs in the VP2 capsid protein  
257 hypervariable region, might play an essential role in the degree of the virulence displayed between  
258 different IPNV isolates (Bruslind and Reno, 2000; Skjesol et al., 2011). It is also likely that this  
259 specific constellation of the amino acid residues reported in these isolates has helped the virus to  
260 escape the host defence barrier, despite fish being regarded as resistant to IPNV. In the VP4, the  
261 deduced amino acid residue, unique to the assembled isolates (Table 2; Supplementary File 1), is  
262 located in position 585. The amino acid substitution is a glycine (G) residue, compared to the other  
263 sequences investigated in this study, where they carry an aspartate (D) (Table 2).

#### 264 **Comparative sequence analysis of VP5**

265 All assemblies contain the VP5, the partial overlapping, non-structural protein, of segment A.  
266 Similar to the polyprotein, the phylogenetic analysis of the VP5, grouped the assemblies into two  
267 distinct groups and further clustered them with the isolates from the Sp serotype (Figure 2B). The  
268 two assembled groups differ in only one amino acid residue at position 90, with the first four  
269 assemblies carrying an arginine (R) while the two other assemblies are having a glycine (G)  
270 (Supplementary File 3). Sequence analysis of the deduced amino acids of VP5 did not reveal any  
271 unique residue in the assembled isolates compared to all other sequences. Comparing to the other  
272 Sp serotypes, however, the amino acid in position 98 differs between the isolates (Supplementary

273 File 3). At this position, all the investigated Sp isolates carry an R while in the assemblies, the  
274 residue is tryptophan (W). It has been shown that the VP5's protein is generally produced during  
275 the initial stages of replication (Heppell et al., 1995a), and at least in the Ab serotype, it seems that  
276 this protein to be involved in anti-apoptotic functions (Hong and Wu, 2002). However, this  
277 product's importance in viral growth or virulence has so far remained ambiguous (e.g., Julin et al.  
278 2013; Dopazo 2020).

### 279 **Comparative sequence analysis of VP1**

280 The phylogenetic analysis of VP1 clustered the assemblies into three distinct clades  
281 (Supplementary Figure 2B) with the amino acid variations in positions 119 (threonine (T) to  
282 methionine (M)) and 701 (T to alanine (A) and serine (S)) (Supplementary File 2; Supplementary  
283 Table 3A). The nucleotide sequence comparisons, shows a greater rate of divergence in the VP1  
284 of the assemblies compared to those of the polyprotein, suggesting that the B segment of the  
285 genome has a higher rate of nucleotide mutation (Supplementary Tables 1 and 2). Comparing the  
286 deduced amino acid sequences of the assembled genomes to the VP1 section of 120 IPNV  
287 sequences, further revealed only a single, almost unique residue in our isolates (Supplementary  
288 File 2). The amino acid residue in position 656 of the assembled isolates is glutamate (E), while in  
289 the majority of other strains, the amino acid is either aspartate (D) or alanine (A). The only other  
290 isolates, carrying an E in this position, are two sequences recovered from Atlantic salmon  
291 (KY548520) and Brown trout (*Salmo trutta* L.) (KY548519) in Finland following outbreaks  
292 (Holopainen et al., 2017). However, it should be noted that so far, the role of VP1 in determining  
293 the degree of IPNV virulence has remained ambiguous. For example, in a study conducted by Song  
294 et al. (2005), through construction and comparative assessment of chimeric IPNV strains, the  
295 authors suggested that VP1 is not involved in this pathogen's virulence. On the other hand, the data

296 reported by Shivappa et al. (2004), is suggestive that the amino acids on the B segment of the  
297 genome in combination with specific residues in VP2, might help to modulate the magnitude of  
298 virulence. Work in the infectious bursal disease virus (IBDV) has also shown that variations in the  
299 amino acid residues of the VP1 can change the kinetics of viral replication and influence the virus's  
300 virulence (Liu and Vakharia, 2004). VP1 interacts with VP3 to form VP1-VP3 complexes, and as  
301 such, can affect various aspects of the virus biology, including its replication efficiency (Pedersen  
302 et al., 2007; Tacken et al., 2002).

### 303 **Concluding remarks**

304 In light of the findings reported in this study, a key point worth noting is the importance of  
305 understanding the genetic interactions between the host and the pathogen in determining an  
306 infection's outcome. As a general trend, research studies tend to mainly focus on either the host or  
307 the pathogen's genetic polymorphisms while investigating the genetic basis of disease-related  
308 phenotypic variations. While the merits of such a targeted approach cannot be disputed, it is  
309 becoming increasingly important also to be aware of the detailed genetic and genomic variations  
310 and interactions between the host and the microbe. In the case of monogenic infectious diseases,  
311 it is relatively trivial to speculate whether a new form of a pathogen interacts in fundamentally  
312 different ways with the host's defence mechanism. For instance, considering that resistance to  
313 IPNV in Atlantic salmon is mainly determined by variations in a single gene, one might expect  
314 that the mutations acquired by the virus strain reported in this paper might have offered an adaptive  
315 advantage, assisting the pathogen to establish successful infection, irrespective of the variations in  
316 the *cdh1* gene. Of course, pinpointing the causative mutations and understanding and validating  
317 the molecular basis of such adaptive variations is a substantial undertaking by itself. The task of  
318 identifying and untangling the dynamics of how genotypic variations in the host and the pathogen

319 influence one another and affect the outcome of an infection becomes more challenging while  
320 investigating diseases with polygenetic nature. This point becomes even more critical, considering  
321 our rapidly changing environments that can facilitate the transmission dynamics and the  
322 geographical spread of the pathogens (Reid et al., 2019). For instance, changes in water  
323 temperature, pH and oxygen have been linked to saprolegniasis in the Indian major carps (*Catla*  
324 *catla*, *Labeo rohita* and *Chirrinus mrigal*) (Das et al., 2012) and to white spot syndrome virus in  
325 prawns (*Penaeus monodon* and *Fenneropenaeus indicus*) (Selvam et al., 2012). Fortunately,  
326 advancements in technologies such as sequencing, genotyping, computational analysis and  
327 molecular biology can now provide us with many necessary tools, if we are set to understand the  
328 dynamics of the interactions between the host and the microbe at their detailed molecular levels.

#### 329 **Data availability**

330 All datasets generated for this study are included in the article (Supplementary Data) and have also  
331 been deposited in GenBank under the accession numbers MW496366, MW496367, MW496368,  
332 MW496369, MW496370, MW496371, MW496372, MW496373, MW496374, MW496375,  
333 MW496376 and MW496377.

#### 334 **Funding**

335 There is no external funding to report.

#### 336 **Acknowledgements**

337 We would like to thank the Fish Vet Group Norway and especially Dr Marianne Kraugerud and  
338 Mr Simon Rey for all the laboratory work and the Norwegian Sequencing Centre for the excellent  
339 work and guidance.

#### 340 **Contributions**

341 G.M., S.J. and B.H. arranged for tissue sampling, shipment and all laboratory and sequencing  
342 procedures. H.M. performed analyses of the sequence data. B.H. and H.M. drafted the manuscript.  
343 All authors contributed to the development of the paper, interpretation of the results and  
344 improvement of the manuscript.

#### 345 **Disclosure of potential conflicts of interest**

346 No potential conflicts of interest.

#### 347 **References**

- 348 Blake, S., Ma, J. Y., Caporale, D. A., Jairath, S., and Nicholson, B. L. (2001). Phylogenetic  
349 relationships of aquatic birnaviruses based on deduced amino acid sequences of genome  
350 segment A cDNA. *Dis. Aquat. Organ.* 45, 89–102.
- 351 Bolger, A. M., Lohse, M., and Usadel, B. (2014). Trimmomatic: A flexible trimmer for Illumina  
352 sequence data. *Bioinformatics* 30, 2114–20.
- 353 Bruslind, L. D., and Reno, P. W. (2000). Virulence comparison of three Buhl-subtype isolates of  
354 infectious pancreatic necrosis virus in brook trout fry. *J. Aquat. Anim. Health* 12, 301–15.
- 355 Das, S. K., Murmu, K., Das, A., Shakuntala, I., Das, R. K., Ngachan, S. V., et al. (2012). Studies  
356 on the identification and control of pathogen *Saprolegnia* in selected Indian major carp  
357 fingerlings at mid hill altitude. *J. Environ. Biol.* 33, 545–549.
- 358 Dobos, P., and Roberts, T. E. (1983). The molecular biology of infectious pancreatic necrosis  
359 virus: A review. *Can. J. Microbiol.* 29, 377–84.
- 360 Dopazo, C. P. (2020). The infectious pancreatic necrosis virus (IPNV) and its virulence  
361 determinants: What is known and what should be known. *Pathogens* 9, 94.
- 362 Duncan, R., and Dobos, P. (1986). The nucleotide sequence of infectious pancreatic necrosis  
363 virus (IPNV) dsRNA segment a reveals one large orf encoding a precursor polyprotein.



- 364 *Nucleic Acids Res.* 14, 5934.
- 365 Duncan, R., Nagy, E., Krell, P. J., and Dobos, P. (1987). Synthesis of the infectious pancreatic  
366 necrosis virus polyprotein, detection of a virus-encoded protease, and fine structure  
367 mapping of genome segment A coding regions. *J. Virol.* 61, 3655–64.
- 368 Edgar, R. C. (2004). MUSCLE: Multiple sequence alignment with high accuracy and high  
369 throughput. *Nucleic Acids Res.* 32, 1792–7.
- 370 Ellis, A. E., Cavaco, A., Petrie, A., Lockhart, K., Snow, M., and Collet, B. (2010). Histology,  
371 immunocytochemistry and qRT-PCR analysis of Atlantic salmon, *Salmo salar* L., post-  
372 smolts following infection with infectious pancreatic necrosis virus (IPNV). *J. Fish Dis.* 33,  
373 803–18.
- 374 Fourment, M., and Holmes, E. C. (2016). Seqotron: A user-friendly sequence editor for Mac OS  
375 X. *BMC Res. Notes* 9, 106.
- 376 Grabherr, M. G., Haas, B. J., Yassour, M., Levin, J. Z., Thompson, D. A., Amit, I., et al. (2011).  
377 Full-length transcriptome assembly from RNA-Seq data without a reference genome. *Nat.*  
378 *Biotechnol.* 29, 644–52.
- 379 Guy, D. R., Bishop, S. C., Brotherstone, S., Hamilton, A., Roberts, R. J., McAndrew, B. J., et al.  
380 (2006). Analysis of the incidence of infectious pancreatic necrosis mortality in pedigreed  
381 Atlantic salmon, *Salmo salar* L., populations. *J. Fish Dis.* 29, 637–47.
- 382 Hastein, T., and Krogsrud, J. (1976). Infectious pancreatic necrosis: first isolation of virus from  
383 fish in Norway. *Acta Vet. Scand.* 17, 109–11.
- 384 Heppell, J., Tarrab, E., Berthiaume, L., Lecomte, J., and Arella, M. (1995a). Characterization of  
385 the small open reading frame on genome segment A of infectious pancreatic necrosis virus.  
386 *J. Gen. Virol.* 76, 2091–96.

- 387 Heppell, J., Tarrab, E., Lecomte, J., Berthiaume, L., and Arella, M. (1995b). Strain Variability  
388 and Localization of Important Epitopes on the Major Structural Protein (VP2) of Infectious  
389 Pancreatic Necrosis Virus1. *Virology* 214, 40–49.
- 390 Hill, B. J., and Way, K. (1995). Serological classification of infectious pancreatic necrosis (IPN)  
391 virus and other aquatic birnaviruses. *Annu. Rev. Fish Dis.* 5, 55–77.
- 392 Holopainen, R., Eriksson-Kallio, A. M., and Gadd, T. (2017). Molecular characterisation of  
393 infectious pancreatic necrosis viruses isolated from farmed fish in Finland. *Arch. Virol.* 162,  
394 3459–71.
- 395 Hong, J. R., and Wu, J. L. (2002). Induction of apoptotic death in cells via Bad gene expression  
396 by infectious pancreatic necrosis virus infection. *Cell Death Differ.* 9, 113–24.
- 397 Houston, R. D., Haley, C. S., Hamilton, A., Guy, D. R., Mota-Velasco, J. C., Gheyas, A. A., et  
398 al. (2010). The susceptibility of Atlantic salmon fry to freshwater infectious pancreatic  
399 necrosis is largely explained by a major QTL. *Heredity (Edinb).* 105, 318–27.
- 400 Houston, R. D., Haley, C. S., Hamilton, A., Guy, D. R., Tinch, A. E., Taggart, J. B., et al. (2008).  
401 Major quantitative trait loci affect resistance to infectious pancreatic necrosis in Atlantic  
402 salmon (*Salmo salar*). *Genetics* 178, 1109–15.
- 403 Jarp, J., Gjevre, A. G., Olsen, A. B., and Bruheim, T. (1995). Risk factors for furunculosis,  
404 infectious pancreatic necrosis and mortality in post-smolt of Atlantic salmon, *Salmo solar* L.  
405 *J. Fish Dis.* 18, 67–78.
- 406 Julin, K., Mennen, S., and Sommer, A. I. (2013). Study of virulence in field isolates of infectious  
407 pancreatic necrosis virus obtained from the northern part of Norway. *J. Fish Dis.* 36, 89–  
408 102.
- 409 Kjølglum, S., Henryon, M., Aasmundstad, T., and Korsgaard, I. (2008). Selective breeding can

410 increase resistance of Atlantic salmon to furunculosis, infectious salmon anaemia and  
411 infectious pancreatic necrosis. *Aquac. Res.* 39, 498–505.

412 Kristoffersen, A. B., Devold, M., Aspehaug, V., Gjelstenli, O., Breck, O., and Jensen, B. B.  
413 (2018). Molecular tracing confirms that infection with infectious pancreatic necrosis virus  
414 follows the smolt from hatchery to grow-out farm. *J. Fish Dis.* 41, 1601–7.

415 Kumar, S., Stecher, G., Li, M., Knyaz, C., and Tamura, K. (2018). MEGA X: Molecular  
416 evolutionary genetics analysis across computing platforms. *Mol. Biol. Evol.* 35, 1547–9.

417 Larkin, M. A., Blackshields, G., Brown, N. P., Chenna, R., Mcgettigan, P. A., McWilliam, H., et  
418 al. (2007). Clustal W and Clustal X version 2.0. *Bioinformatics* 23, 2947–8.

419 Lien, S., Koop, B. F., Sandve, S. R., Miller, J. R., Kent, M. P., Nome, T., et al. (2016). The  
420 Atlantic salmon genome provides insights into rediploidization. *Nature* 533, 200–5.

421 Liu, M., and Vakharia, V. N. (2004). VP1 protein of infectious bursal disease virus modulates  
422 the virulence in vivo. *Virology* 330, 62–73.

423 LMD (Landbruks- og matdepartementet) (1991). Forskrift om fortegnelser over sjukdommer  
424 som omfattes av midlertidig lov mot sjukdom hos akvatiske organismer. Norway:  
425 Norwegian Ministry of Agriculture and Food.

426 M’Gonigle, R. H. (1941). Acute Catarrhal Enteritis of Salmonid Fingerlings. *Trans. Am. Fish.*  
427 *Soc.* 70, 297–303.

428 Moen, T., Baranski, M., Sonesson, A. K., and Kjøglum, S. (2009). Confirmation and fine-  
429 mapping of a major QTL for resistance to infectious pancreatic necrosis in Atlantic salmon  
430 (*Salmo salar*): Population-level associations between markers and trait. *BMC Genomics* 10,  
431 368.

432 Moen, T., Torgersen, J., Santi, N., Davidson, W. S., Baranski, M., Ødegård, J., et al. (2015).

- 433 Epithelial cadherin determines resistance to infectious pancreatic necrosis virus in Atlantic  
434 salmon. *Genetics* 200, 1313–26.
- 435 Munang'Andu, H. M., Fredriksen, B. N., Mutoloki, S., Dalmo, R. A., and Evensen, Ø. (2013).  
436 Antigen dose and humoral immune response correspond with protection for inactivated  
437 infectious pancreatic necrosis virus vaccines in Atlantic salmon (*Salmo salar* L). *Vet. Res.*  
438 44, 7.
- 439 Munang'andu, H. M., Santi, N., Fredriksen, B. N., Løkling, K. E., and Evensen, Ø. (2016). A  
440 systematic approach towards optimizing a cohabitation challenge model for infectious  
441 pancreatic necrosis virus in Atlantic salmon (*Salmo salar* L). *PLoS One* 11, e0148467.
- 442 Mutoloki, S., Jøssund, T. B., Ritchie, G., Munang'andu, H. M., and Evensen, Ø. (2016).  
443 Infectious pancreatic necrosis virus causing clinical and subclinical infections in atlantic  
444 salmon have different genetic fingerprints. *Front. Microbiol.* 7, 1393.
- 445 NFD (Nærings- og fiskeridepartementet) (2008). Forskrift om drift av akvakulturanlegg.  
446 Norway.
- 447 Nishizawa, T., Kinoshita, S., and Yoshimizu, M. (2005). An approach for genogrouping of  
448 Japanese isolates of aquabirnaviruses in a new genogroup, VII, based on the VP2/NS  
449 junction region. *J. Gen. Virol.* 86, 1973–8.
- 450 Okonechnikov, K., Golosova, O., Fursov, M., Varlamov, A., Vaskin, Y., Efremov, I., et al.  
451 (2012). Unipro UGENE: A unified bioinformatics toolkit. *Bioinformatics* 28, 1166–7.
- 452 Pedersen, T., Skjesol, A., and Jørgensen, J. B. (2007). VP3, a Structural Protein of Infectious  
453 Pancreatic Necrosis Virus, Interacts with RNA-Dependent RNA Polymerase VP1 and with  
454 Double-Stranded RNA. *J. Virol.* 81, 6652–63.
- 455 Quast, C., Pruesse, E., Yilmaz, P., Gerken, J., Schweer, T., Yarza, P., et al. (2013). The SILVA

- 456 ribosomal RNA gene database project: Improved data processing and web-based tools.  
457 *Nucleic Acids Res.* 41, 590–6.
- 458 Reid, G. K., Gurney-Smith, H. J., Marcogliese, D. J., Knowler, D., Benfey, T., Garber, A. F., et  
459 al. (2019). Climate change and aquaculture: Considering biological response and resources.  
460 *Aquac. Environ. Interact.* 11, 569–602.
- 461 Roberts, R. J., and Pearson, M. D. (2005). Infectious pancreatic necrosis in Atlantic salmon,  
462 *Salmo salar* L. *J. Fish Dis.* 28, 383–390.
- 463 Santi, N., Song, H., Vakharia, V. N., and Evensen, Ø. (2005). Infectious Pancreatic Necrosis  
464 Virus VP5 Is dispensable for virulence and Persistence. *J. Virol.* 79, 9206–16.
- 465 Santi, N., Vakharia, V. N., and Evensen, Ø. (2004). Identification of putative motifs involved in  
466 the virulence of infectious pancreatic necrosis virus. *Virology* 322, 31–40.
- 467 Selvam, D. G., Mujeeb Rahiman, K. M., and Mohamed Hatha, A. A. (2012). An Investigation  
468 into occasional white spot syndrome virus outbreak in traditional paddy cum prawn fields in  
469 India. *Sci. World J.*, 340830.
- 470 Shivappa, R. B., Song, H., Yao, K., Aas-Eng, A., Evensen, and Vakharia, V. N. (2004).  
471 Molecular characterization of Sp serotype strains of infectious pancreatic necrosis virus  
472 exhibiting differences in virulence. *Dis. Aquat. Organ.* 61, 23–32.
- 473 Skjesol, A., Skjæveland, I., Elnæs, M., Timmerhaus, G., Fredriksen, B. N., Jørgensen, S., et al.  
474 (2011). IPNV with high and low virulence: Host immune responses and viral mutations  
475 during infection. *Virol. J.* 8, 396.
- 476 Smail, D. A., Bain, N., Bruno, D. W., King, J. A., Thompson, F., Pendrey, D. J., et al. (2006).  
477 Infectious pancreatic necrosis virus in Atlantic salmon, *Salmo salar* L., post-smolts in the  
478 Shetland Isles, Scotland: Virus identification, histopathology, immunohistochemistry and

- 479 genetic comparison with Scottish mainland isolates. *J. Fish Dis.* 29, 31–41.
- 480 Sommerset, I., Walde, C. S., Bang Jensen, B., Bornø, B., Haukaas, A., and Brun, E. (2020).
- 481 Fiskehelserapporten 2019. Norway.
- 482 Song, H., Santi, N., Evensen, Ø., and Vakharia, V. N. (2005). Molecular determinants of
- 483 Infectious Pancreatic Necrosis Virus virulence and cell culture adaptation. *J. Virol.* 79,
- 484 10289–99.
- 485 Sundh, H., Olsen, R. E., Fridell, F., Gadan, K., Evensen, O., Glette, J., et al. (2009). The effect of
- 486 hyperoxygenation and reduced flow in fresh water and subsequent infectious pancreatic
- 487 necrosis virus challenge in sea water, on the intestinal barrier integrity in Atlantic salmon,
- 488 *Salmo salar* L. *J. Fish Dis.* 32, 687–98.
- 489 Tacken, M. G. J., Peeters, B. P. H., Thomas, A. A. M., Rottier, P. J. M., and Boot, H. J. (2002).
- 490 Infectious Bursal Disease Virus Capsid Protein VP3 Interacts both with VP1, the RNA-
- 491 Dependent RNA Polymerase, and with Viral Double-Stranded RNA. *J. Virol.* 89, 11165–
- 492 68.
- 493 Tamura K, Nei M, and Kumar S (2004). Prospects for inferring very large phylogenies by using
- 494 the neighbor-joining method. *Proc. Natl. Acad. Sci. U. S. A.* 101, 11030–5.
- 495 Trapnell, C., Pachter, L., and Salzberg, S. L. (2009). TopHat: Discovering splice junctions with
- 496 RNA-Seq. *Bioinformatics* 25, 1105–11.
- 497 Trapnell, C., Roberts, A., Goff, L., Pertea, G., Kim, D., Kelley, D. R., et al. (2012). Differential
- 498 gene and transcript expression analysis of RNA-seq experiments with TopHat and
- 499 Cufflinks. *Nat. Protoc.* 7, 562–78.
- 500 Wetten, M., Aasmundstad, T., Kjøglum, S., and Storset, A. (2007). Genetic analysis of resistance
- 501 to infectious pancreatic necrosis in Atlantic salmon (*Salmo salar* L.). *Aquaculture* 272, 111–

502 7.

503 Wolf, K., Snieszko, S. F., Dunbar, C. E., and Pyle, E. (1960). Virus Nature of Infectious

504 Pancreatic Necrosis in Trout. *Proc. Soc. Exp. Biol. Med.* 104, 25743.

505

In review

506 **Figure Legends**

507 **Figure 1.** A. Histology section of the pancreatic tissue infected with the infectious pancreatic  
508 necrosis virus (IPNV). Arrows indicate acute necrosis of pancreatic acinar cells. B.  
509 Immunohistochemical staining of the pancreas tissue using antibodies specific for IPNV. Red  
510 colours show cells infected with this virus (arrow).

511 **Figure 2.** Neighbour-Joining tree, showing the phylogenetic relationship between the A.  
512 Polyprotein and B. VP5's deduced amino acid data from different IPNV reference strains, and the  
513 assemblies reported in this study. The accession ids of the sequences are presented in Table 2. The  
514 associated genogroups are in parentheses. BG 1 to 6 represent isolates identified in the current  
515 work. The confidence of association between sequences was estimated using bootstrap testing  
516 (1000 replicates) and is shown next to the branches. The Maximum Composite Likelihood method  
517 (Tamura K et al., 2004) was used to estimate the isolates' evolutionary distances.

518



519 **Table 1.** Amino acid sequences in segment A of the newly identified IPNV isolate compared with  
520 previously reported key residues suggested being correlated with viral virulence (Santi et al.,  
521 2004).

| Accession  | Isolate | 217 | 221 <sup>a</sup> | 247 | 252 | 500 | Virulence |
|------------|---------|-----|------------------|-----|-----|-----|-----------|
| AY374435.1 | NVI-001 | T   | A/T              | T   | V   | Y   | avirulent |
| AY379742.1 | NVI-016 | P   | T                | A   | N   | Y   | avirulent |
| AY379744.1 | NVI-010 | P   | T                | A   | N   | H   | moderate  |
| AY379735.1 | NVI-011 | T   | T/A              | A   | V   | H   | virulent  |
| AY379738.1 | NVI-013 | T   | A/T              | T   | V   | Y   | virulent  |
| AY379740.1 | NVI-015 | T   | A/T              | T   | V   | Y   | virulent  |
| AY379736.1 | NVI-020 | T   | T/A              | A   | V   | H   | virulent  |
| AY379737.1 | NVI-023 | T   | A/T              | T   | V   | Y   | virulent  |
| -          | BG      | P   | T                | A   | D   | Y   | -         |

522 <sup>a</sup> Double peak on the chromatograms after two cell culture passages.  
523 The dominating amino acid is indicated first.

524

525 **Table 2.** Amino acid residues and their positions in the polyprotein region of the IPNV isolates  
 526 reported in this study that are either exclusively unique or occur with a very low frequency in other  
 527 strains.

| Num. | Accession | ID         | 245 | 248 | 252 | 255 | 257 | 278 | 282 | 285 | 321 | 585 |
|------|-----------|------------|-----|-----|-----|-----|-----|-----|-----|-----|-----|-----|
| 1    | -         | BG         | G   | R   | D   | T   | H   | A   | T   | H   | D   | G   |
| 2    | AJ829474  | Sp_975/99  | S   | E   | I   | K   | D   | V   | N   | Y   | G   | D   |
| 3    | AY379735  | Sp_NVI-011 | S   | E   | V   | K   | D   | V   | N   | Y   | G   | D   |
| 4    | AY379738  | Sp_NVI-013 | S   | E   | V   | K   | D   | V   | N   | Y   | G   | D   |
| 5    | AY379740  | Sp_NVI-015 | S   | E   | V   | K   | D   | V   | N   | Y   | G   | D   |
| 6    | AY379736  | Sp_NVI-020 | S   | E   | V   | K   | D   | V   | N   | Y   | G   | D   |
| 7    | AY379737  | Sp_NVI-023 | S   | E   | V   | K   | D   | V   | N   | Y   | G   | D   |
| 8    | AY379744  | Sp_NVI-010 | S   | E   | N   | K   | D   | V   | N   | Y   | G   | D   |
| 9    | AY374435  | Sp_NVI-001 | S   | E   | V   | K   | D   | V   | N   | Y   | G   | D   |
| 10   | AY379742  | Sp_NVI-016 | S   | E   | N   | K   | D   | V   | D   | Y   | G   | D   |
| 11   | AF343573  | Buhl       | Q   | A   | N   | V   | D   | T   | V   | H   | A   | D   |
| 12   | AF342729  | Ab         | S   | N   | A   | K   | D   | V   | A   | Y   | A   | D   |
| 13   | AF342730  | He         | N   | Q   | N   | K   | D   | V   | E   | Y   | G   | D   |
| 14   | AF342731  | Te         | R   | A   | A   | K   | D   | V   | A   | F   | T   | D   |
| 15   | AF342732  | C1         | S   | R   | T   | R   | D   | V   | A   | F   | T   | D   |
| 16   | AF342733  | C2         | S   | T   | A   | T   | E   | A   | K   | H   | G   | D   |
| 17   | AF342734  | C3         | S   | N   | A   | T   | K   | A   | T   | H   | A   | D   |
| 18   | AF342735  | Jasper     | Q   | A   | N   | R   | D   | A   | A   | H   | G   | D   |
| 19   | AF342727  | WB         | Q   | A   | N   | R   | D   | T   | A   | Y   | G   | D   |

528

529

530 **Supplementary Figure Legends**

531 **Supplementary Figure 1.** Neighbour-Joining trees, showing the phylogenetic relationships  
532 between partial polyprotein nucleotide (A) and the amino acid (B) sequences of the reported  
533 assemblies with an isolate (MH562009) previously recovered from a field outbreak (Kristoffersen  
534 et al., 2018). BG 1 to 6 represent assembled sequences in the current study. The distances were  
535 computed using the Maximum Composite Likelihood method, for nucleotides and Poisson for the  
536 amino acid data. The rate variation among sites was modelled with a gamma distribution (shape  
537 parameter = 1). There were a total of 1513 nucleotides and 504 amino acids in the final dataset.  
538 Evolutionary analyses were conducted in MEGA X.

539  
540 **Supplementary Figure 2.** Neighbour-Joining trees, showing the phylogenetic relationships  
541 between the assembled polyprotein (A) and VP1 (B) segments of the IPNV genomes for the six  
542 samples sequenced in this study. The trees are constructed based on the amino acid sequence  
543 information. The confidence of association, estimated using bootstrap testing (1000 replicates), is  
544 shown next to the branches. There were 2919 and 845 positions in the final datasets for the  
545 polyprotein and VP1 respectively. Analyses were conducted in MEGA X.

546

547 **Supplementary Table 1.** Overview of the laboratory results, confirming the initial diagnosis of the IPNV infection and QTL status of the fish.

| Num. | tissue      | QTL        | qRT-PCR Ct value | histology                                                                           | Immunohistochemistry |
|------|-------------|------------|------------------|-------------------------------------------------------------------------------------|----------------------|
| 1    | adipose fin | Yes        | Not tested       | Not tested                                                                          | Not tested           |
| 2    | adipose fin | Yes        | Not tested       | Not tested                                                                          | Not tested           |
| 3    | adipose fin | Yes        | Not tested       | Not tested                                                                          | Not tested           |
| 4    | adipose fin | Yes        | Not tested       | Not tested                                                                          | Not tested           |
| 5    | adipose fin | Yes        | Not tested       | Not tested                                                                          | Not tested           |
| 6    | adipose fin | Yes        | Not tested       | Not tested                                                                          | Not tested           |
| 7    | adipose fin | Yes        | Not tested       | Not tested                                                                          | Not tested           |
| 8    | adipose fin | Yes        | Not tested       | Not tested                                                                          | Not tested           |
| 9    | adipose fin | Yes        | Not tested       | Not tested                                                                          | Not tested           |
| 10   | adipose fin | Yes        | Not tested       | Not tested                                                                          | Not tested           |
| 11   | kidney      | Not tested | 20.32            | Not tested                                                                          | Not tested           |
| 12   | kidney      | Not tested | 19.79            | Not tested                                                                          | Not tested           |
| 13   | kidney      | Not tested | 18.93            | Not tested                                                                          | Not tested           |
| 14   | kidney      | Not tested | 18.92            | Not tested                                                                          | Not tested           |
| 15   | kidney      | Not tested | 20.77            | Not tested                                                                          | Not tested           |
| 16   | kidney      | Not tested | 19.32            | Not tested                                                                          | Not tested           |
| 17   | multiple    | Not tested | Not tested       | Multifocal necrosis in the exocrine pancreas                                        | positive             |
| 18   | multiple    | Not tested | Not tested       | Multifocal necrosis in exocrine pancreas and multifocal bleeding in abdominal fat   | positive             |
| 19   | multiple    | Not tested | Not tested       | Multifocal necrosis in exocrine pancreas and focal, extensive necrosis in the liver | positive             |

548

**Supplementary Table 2.** Estimates of evolutionary divergence rate between the amino acid

(A) and nucleotide (B) sequences of the polyprotein of the assembled genomes. The actual number of differences are provided in the parentheses. The rate variation among sites was modelled with a gamma distribution (shape parameter = 1).

| <b>A</b>         | <b>BG_1_poly</b> | <b>BG_2_poly</b> | <b>BG_3_poly</b> | <b>BG_4_poly</b> | <b>BG_5_poly</b> | <b>BG_6_poly</b> |
|------------------|------------------|------------------|------------------|------------------|------------------|------------------|
| <b>BG_1_poly</b> | 0 (0)            | 0 (0)            | 0 (0)            | 0 (0)            | 0.00206 (2)      | 0.00206 (2)      |
| <b>BG_2_poly</b> |                  | 0 (0)            | 0 (0)            | 0 (0)            | 0.00206 (2)      | 0.00206 (2)      |
| <b>BG_3_poly</b> |                  |                  | 0 (0)            | 0 (0)            | 0.00206 (2)      | 0.00206 (2)      |
| <b>BG_4_poly</b> |                  |                  |                  | 0 (0)            | 0.00206 (2)      | 0.00206 (2)      |
| <b>BG_5_poly</b> |                  |                  |                  |                  | 0 (0)            | 0 (0)            |
| <b>BG_6_poly</b> |                  |                  |                  |                  |                  | 0 (0)            |

| <b>B</b>         | <b>BG_1_poly</b> | <b>BG_2_poly</b> | <b>BG_3_poly</b> | <b>BG_4_poly</b> | <b>BG_5_poly</b> | <b>BG_6_poly</b> |
|------------------|------------------|------------------|------------------|------------------|------------------|------------------|
| <b>BG_1_poly</b> | 0 (0)            | 0 (0)            | 0 (0)            | 0 (0)            | 0.00308 (9)      | 0.00308 (9)      |
| <b>BG_2_poly</b> |                  | 0 (0)            | 0 (0)            | 0 (0)            | 0.00308 (9)      | 0.00308 (9)      |
| <b>BG_3_poly</b> |                  |                  | 0 (0)            | 0 (0)            | 0.00308 (9)      | 0.00308 (9)      |
| <b>BG_4_poly</b> |                  |                  |                  | 0 (0)            | 0.00308 (9)      | 0.00308 (9)      |
| <b>BG_5_poly</b> |                  |                  |                  |                  | 0 (0)            | 0 (0)            |
| <b>BG_6_poly</b> |                  |                  |                  |                  |                  | 0 (0)            |

In review

**Supplementary Table 3.** Estimates of evolutionary divergence rate between the amino acid (A) and nucleotide (B) sequences of the VP1 of the assembled genomes. The actual number of differences are provided in the parentheses. The rate variation among sites was modelled with a gamma distribution (shape parameter = 1).

| <b>A</b>        | <b>BG_1_VP1</b> | <b>BG_2_VP1</b> | <b>BG_3_VP1</b> | <b>BG_4_VP1</b> | <b>BG_5_VP1</b> | <b>BG_6_VP1</b> |
|-----------------|-----------------|-----------------|-----------------|-----------------|-----------------|-----------------|
| <b>BG_1_VP1</b> | 0 (0)           | 0.00118 (1)     | 0 (0)           | 0.00118 (1)     | 0.00237 (2)     | 0.00237 (2)     |
| <b>BG_2_VP1</b> |                 | 0 (0)           | 0.00118 (1)     | 0 (0)           | 0.00237 (2)     | 0.00237 (2)     |
| <b>BG_3_VP1</b> |                 |                 | 0 (0)           | 0.00118 (1)     | 0.00237 (2)     | 0.00237 (2)     |
| <b>BG_4_VP1</b> |                 |                 |                 | 0 (0)           | 0.00237 (2)     | 0.00237 (2)     |
| <b>BG_5_VP1</b> |                 |                 |                 |                 | 0 (0)           | 0 (0)           |
| <b>BG_6_VP1</b> |                 |                 |                 |                 |                 | 0 (0)           |

| <b>B</b>        | <b>BG_1_VP1</b> | <b>BG_2_VP1</b> | <b>BG_3_VP1</b> | <b>BG_4_VP1</b> | <b>BG_5_VP1</b> | <b>BG_6_VP1</b> |
|-----------------|-----------------|-----------------|-----------------|-----------------|-----------------|-----------------|
| <b>BG_1_VP1</b> | 0 (0)           | 0.00158 (4)     | 0.000395 (1)    | 0.00158 (4)     | 0.00592 (15)    | 0.00553 (14)    |
| <b>BG_2_VP1</b> |                 | 0 (0)           | 0.00118 (3)     | 0 (0)           | 0.00474 (12)    | 0.00434 (11)    |
| <b>BG_3_VP1</b> |                 |                 | 0 (0)           | 0.00118 (3)     | 0.00553 (14)    | 0.00513 (13)    |
| <b>BG_4_VP1</b> |                 |                 |                 | 0 (0)           | 0.00474 (12)    | 0.00434 (11)    |
| <b>BG_5_VP1</b> |                 |                 |                 |                 | 0 (0)           | 0.000395 (1)    |
| <b>BG_6_VP1</b> |                 |                 |                 |                 |                 | 0 (0)           |

In review

### **Supplementary Files**

**Supplementary File 1.** Alignment of the deduced amino acid sequence data from the polyprotein section of the IPNV. BG 1 to 6 represent the six assemblies from the current study.

**Supplementary File 2.** Alignment of the deduced amino acid sequence data from the VP1 section of the IPNV. BG 1 to 6 represent the six assemblies from the current study.

**Supplementary File 3.** Alignment of the deduced amino acid sequence data from the VP5 section of the IPNV. BG 1 to 6 represent the six assemblies from the current study.

In review

Figure 1.TIFF

bioRxiv preprint doi: <https://doi.org/10.1101/2021.05.23.445331>; this version posted May 23, 2021. The copyright holder for this preprint (which was not certified by peer review) is the author/funder, who has granted bioRxiv a license to display the preprint in perpetuity. It is made available under aCC-BY-NC 4.0 International license.

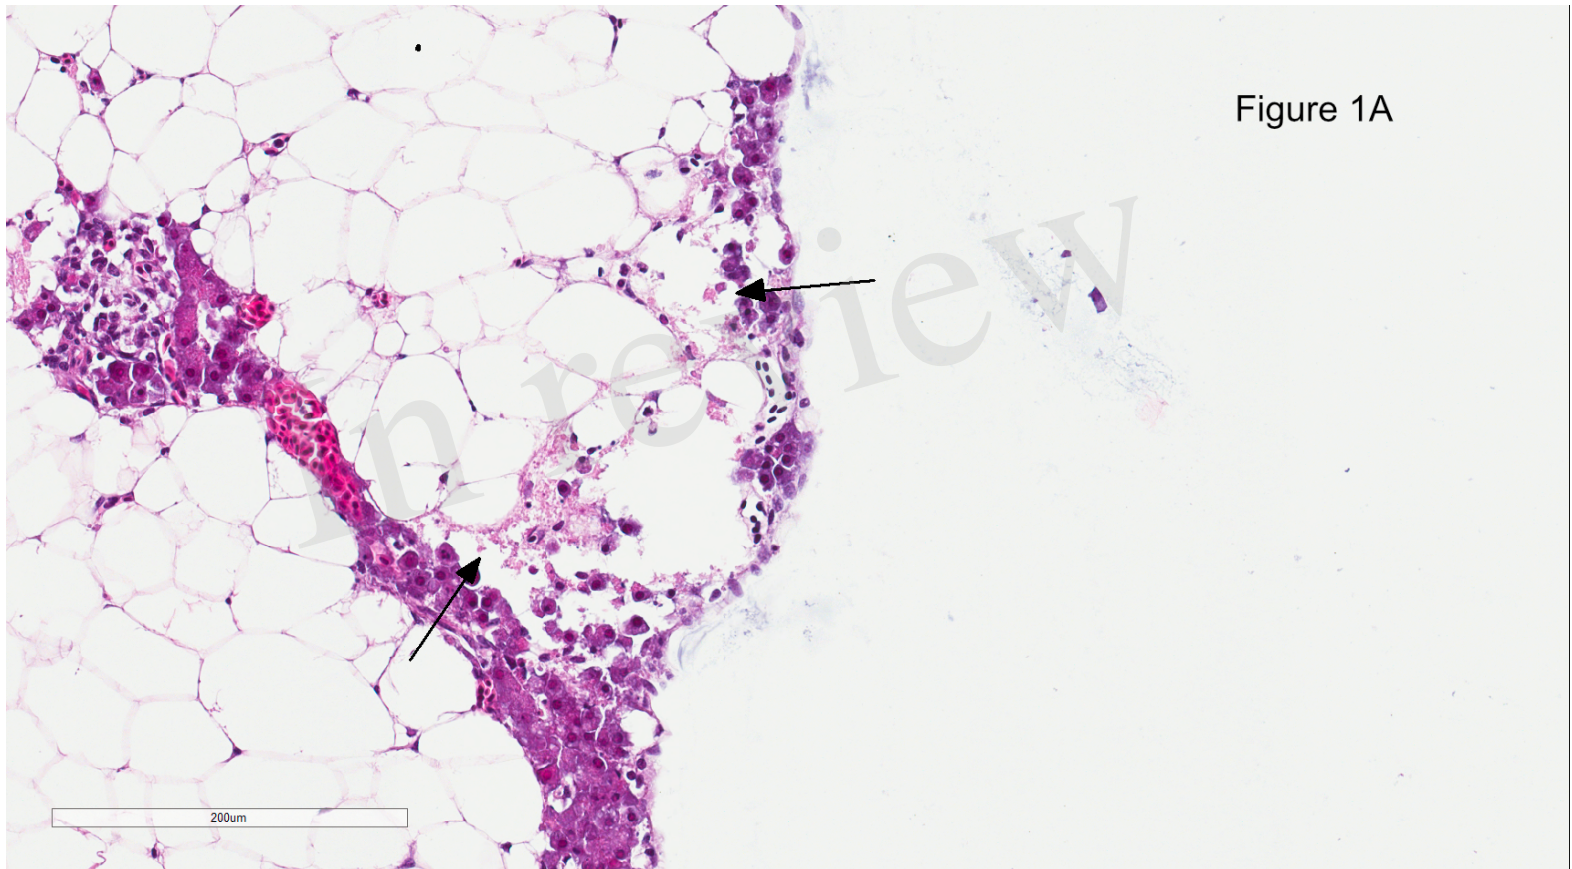



Figure 2.TIFF

bioRxiv preprint doi: <https://doi.org/10.1101/2021.05.23.445331>; this version posted May 23, 2021. The copyright holder for this preprint (which was not certified by peer review) is the author/funder, who has granted bioRxiv a license to display the preprint in perpetuity. It is made available under aCC-BY-NC 4.0 International license.

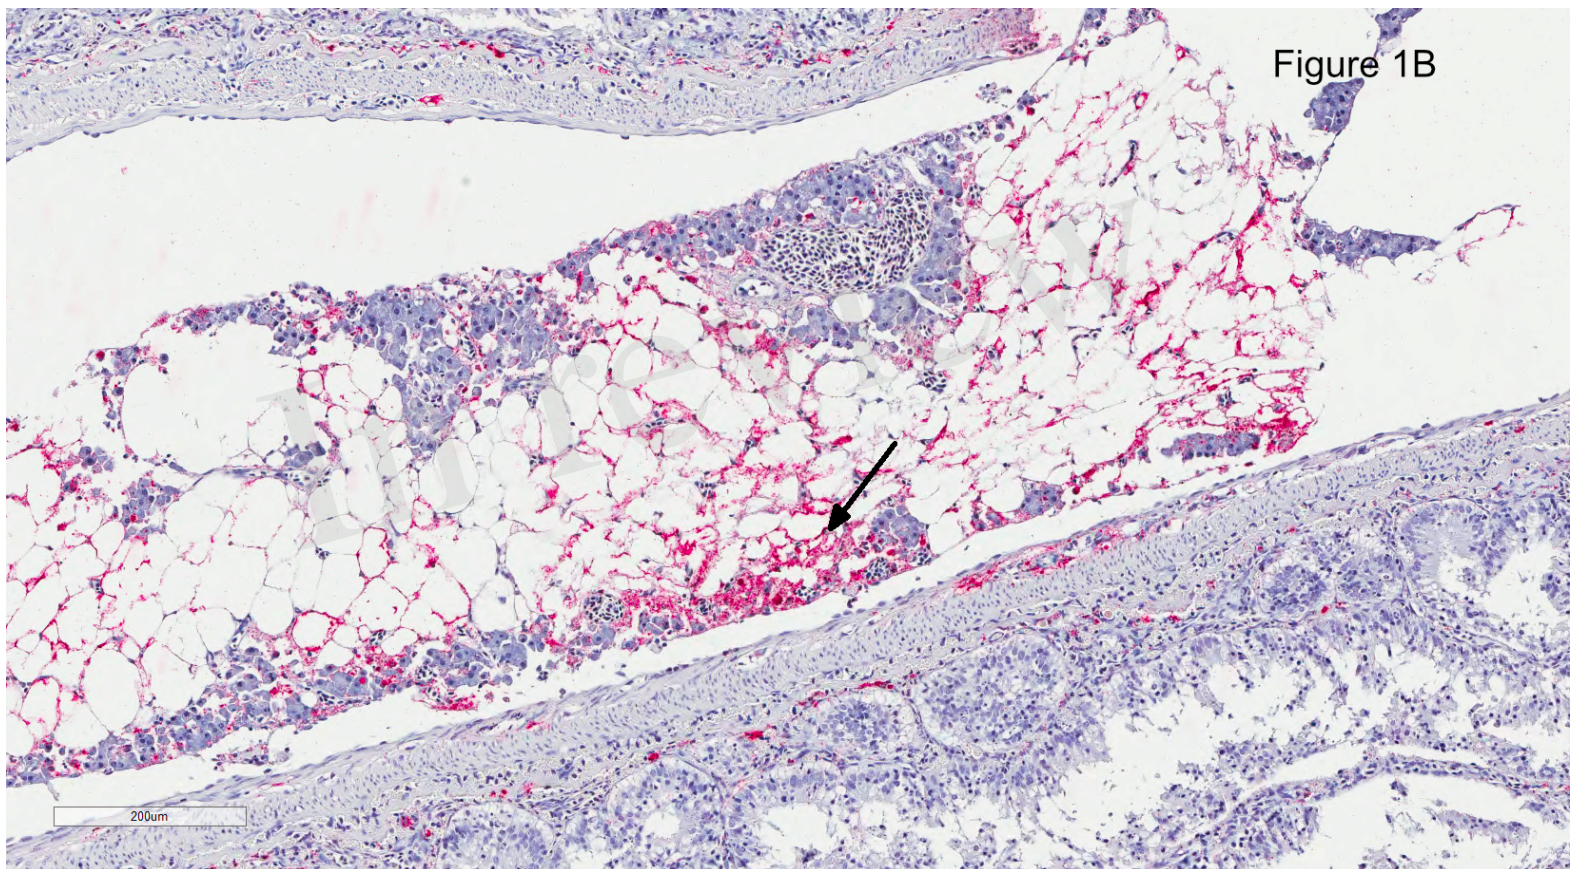

Figure 3.TIFF

bioRxiv preprint doi: <https://doi.org/10.1101/2021.05.23.445331>; this version posted May 23, 2021. The copyright holder for this preprint (which was not certified by peer review) is the author/funder, who has granted bioRxiv a license to display the preprint in perpetuity. It is made available under aCC-BY-NC 4.0 International license.

Figure 2A

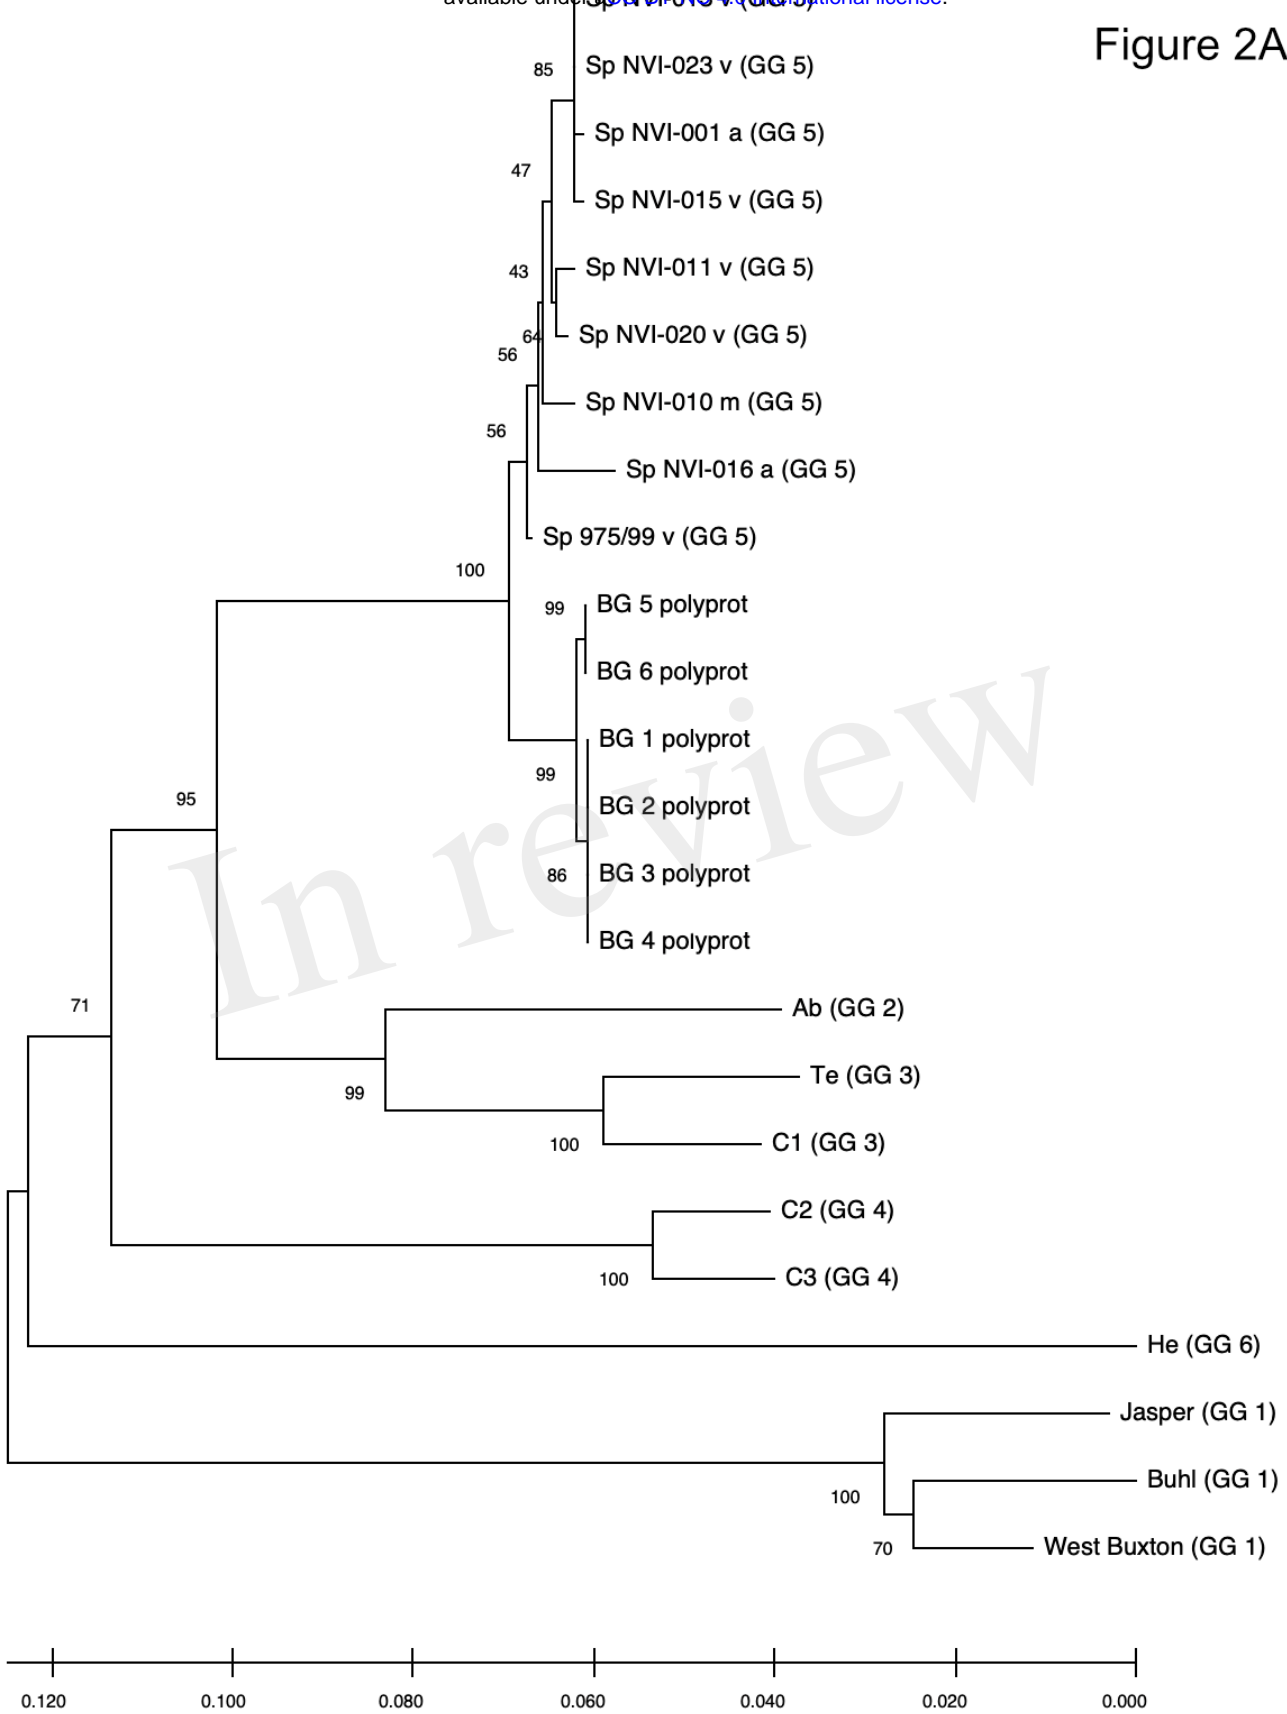

Figure 4.TIFF

bioRxiv preprint doi: <https://doi.org/10.1101/2021.05.23.445331>; this version posted May 23, 2021. The copyright holder for this preprint (which was not certified by peer review) is the author/funder, who has granted bioRxiv a license to display the preprint in perpetuity. It is made available under aCC-BY-NC 4.0 International license.

Figure 2B

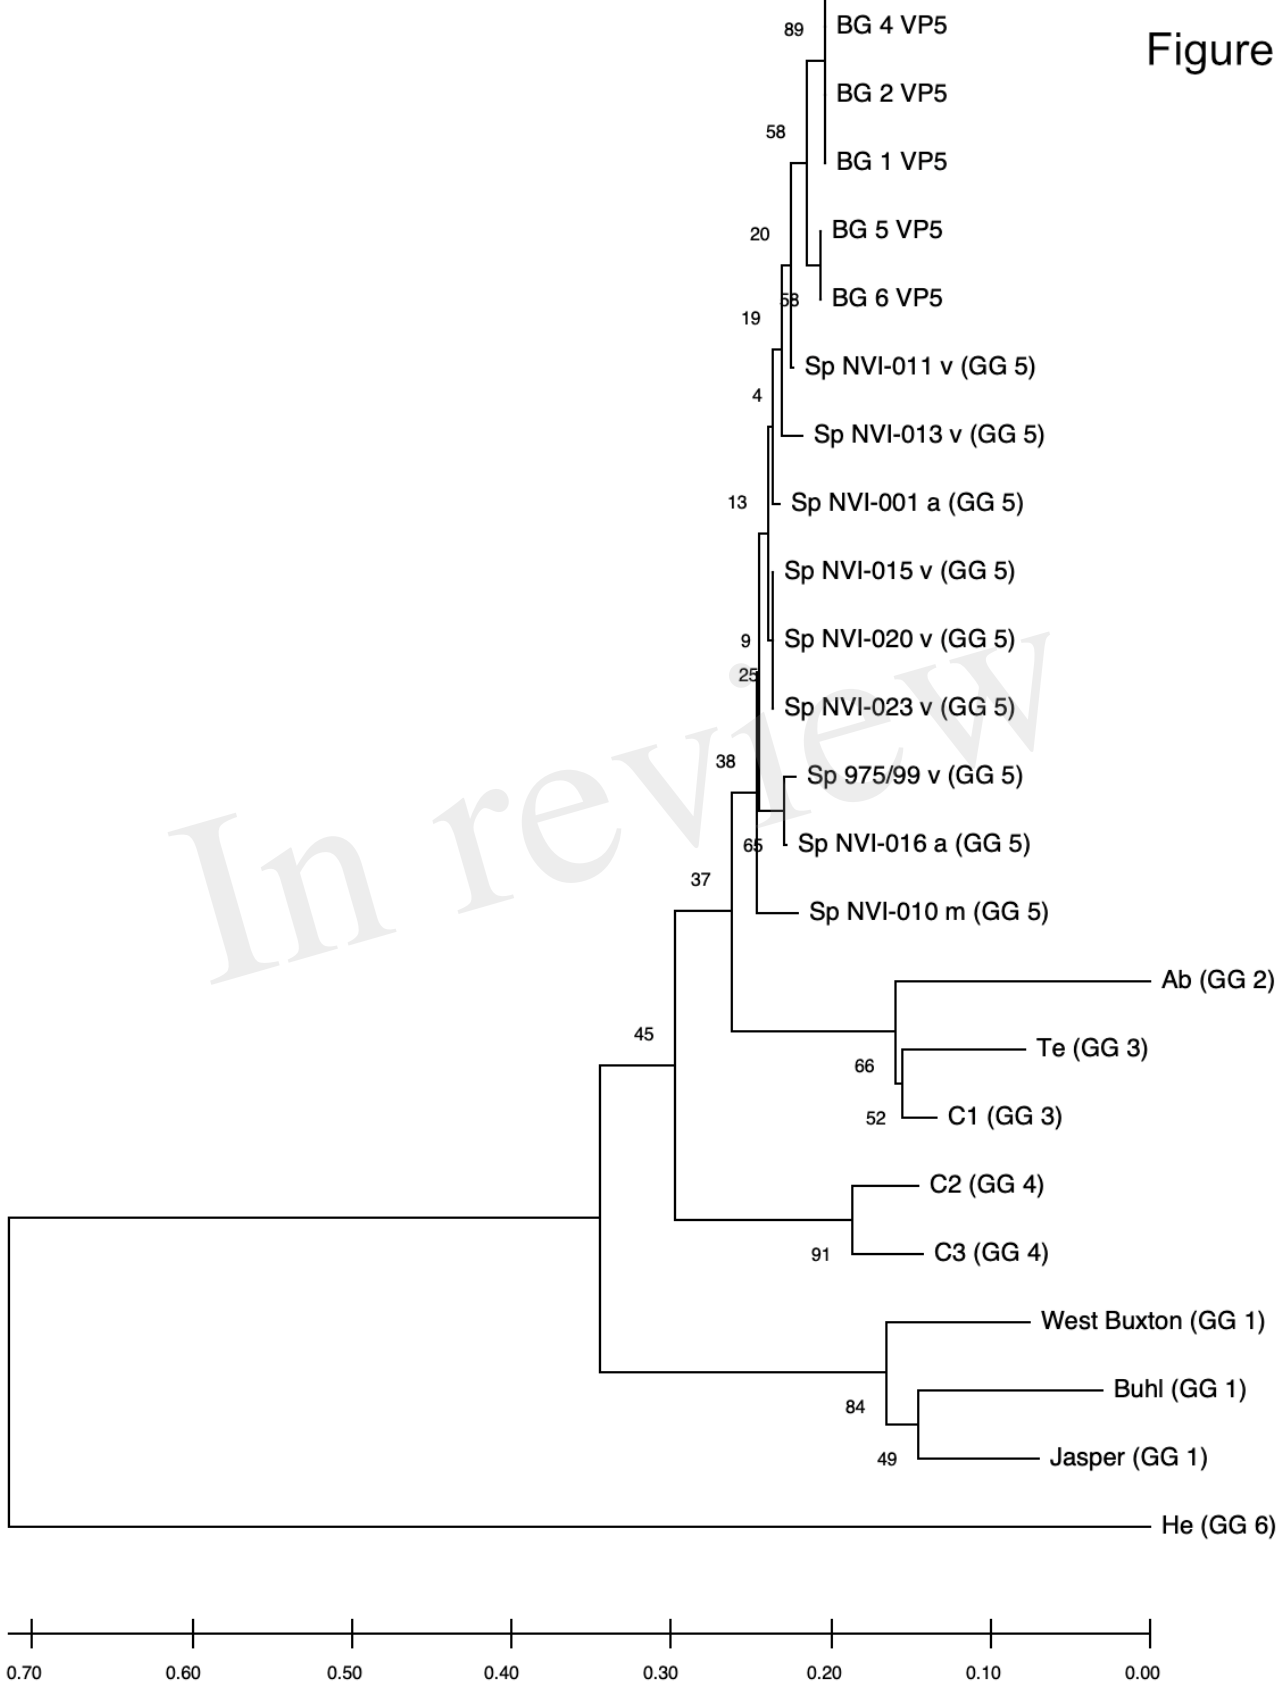

Source: https://www.biorxiv.org/content/10.1101/2021.05.23.445331v1.full.pdf
